# Supplementary material for: Midostaurin reduces Regulatory T cells markers in Acute Myeloid Leukemia
Source: PubMed Central journal article supplement (PMC6277419; doi:10.1038/s41598-018-35978-0), 2018-12-03
Supplement: 41598_2018_35978_MOESM1_ESM.pdf [file 41598_2018_35978_MOESM1_ESM.pdf]

## Midostaurin reduces Regulatory T cells markers in Acute Myeloid Leukemia

**Authors:** Lucas Gutierrez<sup>1</sup>, M.S., Miran Jang<sup>1</sup>, PhD, Tian Zhang<sup>1</sup>, M.S., Mojtaba Akhtari<sup>2</sup>, MD, Houda Alachkar<sup>1,2</sup>, PhD, PharmD

Supplemental figures and tables.

Supplemental Tables:

Table S1. Cytokine levels in supernatants of PBMCs from healthy patients after stimulation with midostaurin for 72 hours

|         | IL-10             |                       | IFN               |                       | TNF               |                       | TGFB              |                       |
|---------|-------------------|-----------------------|-------------------|-----------------------|-------------------|-----------------------|-------------------|-----------------------|
|         | IL-2/IL-7 Control | Midostaurin Treatment | IL-2/IL-7 Control | Midostaurin Treatment | IL-2/IL-7 Control | Midostaurin Treatment | IL-2/IL-7 Control | Midostaurin Treatment |
| Donor 1 | 4.20              | 0.14                  | 301.62            | 37.59                 | 54.50             | 1.34                  | 1711.09           | 1422.20               |
| Donor 2 | 3.13              | 0.11                  | 8043.09           | 32.35                 | 250.95            | 1.57                  | 2103.83           | 2891.72               |
| Donor 3 | 8.55              | 0.06                  | 1819.51           | 26.46                 | 68.47             | 1.14                  | 2454.79           | 1612.67               |

Table S2. Cytokine levels in supernatants of PBMCs from patients with AML after stimulation with midostaurin for 72 hours

|              | IL-10             |                       | IFN               |                       | TNF               |                       | TGFB              |                       |
|--------------|-------------------|-----------------------|-------------------|-----------------------|-------------------|-----------------------|-------------------|-----------------------|
|              | IL-2/IL-7 Control | Midostaurin Treatment | IL-2/IL-7 Control | Midostaurin Treatment | IL-2/IL-7 Control | Midostaurin Treatment | IL-2/IL-7 Control | Midostaurin Treatment |
| AML sample 1 | 1.29E-04          | 0.01                  | 23.72             | 18.79                 | 0.19              | 0.23                  | 917.62            | 834.24                |
| AML sample 2 | 0.01              | 0.01                  | 23.22             | 19.03                 | 0.81              | 0.34                  | 920.06            | 827.42                |
| AML sample 3 | 5.44              | 2.92                  | 72.46             | 44.30                 | 3.90              | 3.07                  | 1690.31           | 1843.87               |
| AML sample 4 | 0.02              | 0.03                  | 24.50             | 20.59                 | 0.99              | 1.98                  | 2039.02           | 1861.33               |
| AML sample 5 | 41.96             | 23.77                 | 2450.20           | 283.33                | 7506.45           | 3819.59               | 1748.25           | 1652.53               |

Table S3: Clinical information related to patients treated with midostaurin included in the study.

| Patient # | Age | Diagnosis                    | % PB blasts | % BM blasts | FLT3 status | Treatment with midostaurin                             | Transplant Status | Months Post-Transplant | Treatment Outcome  | Survival-Months | Survival Status                    |
|-----------|-----|------------------------------|-------------|-------------|-------------|--------------------------------------------------------|-------------------|------------------------|--------------------|-----------------|------------------------------------|
| Patient 1 | 75  | newly diagnosed AML          | 85%         | >90%        | FLT3-ITD    | Cytarabine-midostaurin at induction                    | no                | n/a                    | complete remission | 12 months       | alive                              |
| Patient 2 | 48  | post transplant relapsed AML | 58%         | >80%        | FLT3-ITD    | Cladribine-Cytarabine-midostaurin at induction         | yes               | 27                     | complete remission | 1.5 months      | deceased (disease unrelated cause) |
| Patient 3 | 37  | newly diagnosed AML          | 57%         | 60%         | FLT3-ITD    | midostaurin starting 3 months post transplant          | yes               | 4                      | complete remission | 11.5 months     | alive                              |
| Patient 4 | 71  | newly diagnosed AML          | 65%         | 94%         | FLT3-TKD    | consolidation AraC with midostaurin                    | no                | n/a                    | complete remission | 6.5 months      | alive                              |
| Patient 6 | 41  | newly diagnosed AML          | rare(>1%)   | 26%         | FLT3-ITD    | consolidation cytarabine/daunorubicin with midostaurin | yes               | 3                      | complete remission | 5.5 months      | alive                              |

Supplemental Figures:

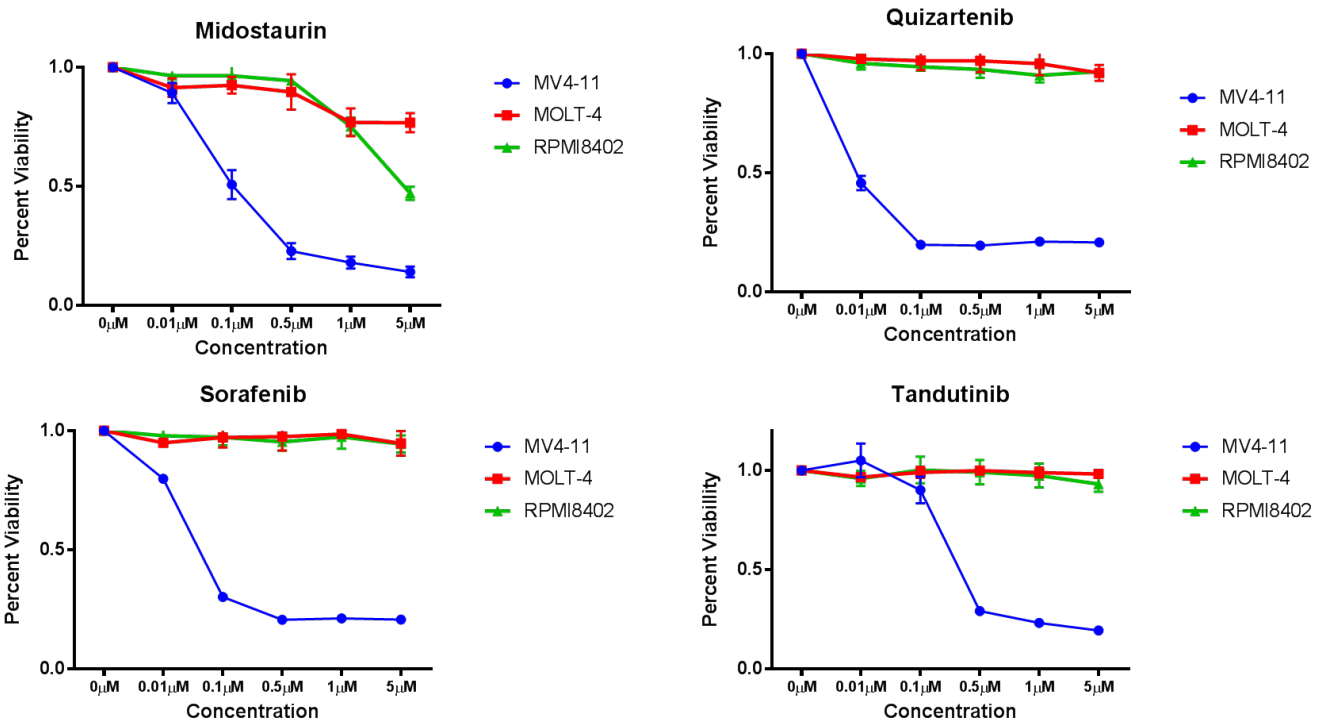

**Figure S1: IC50 of four FLT3 Inhibitors in MV4-11, RPMI8402, and MOLT-4 for A) Midostaurin, B) Quizartenib, C) Sorafenib, D) and Tandutinib (N=3).**

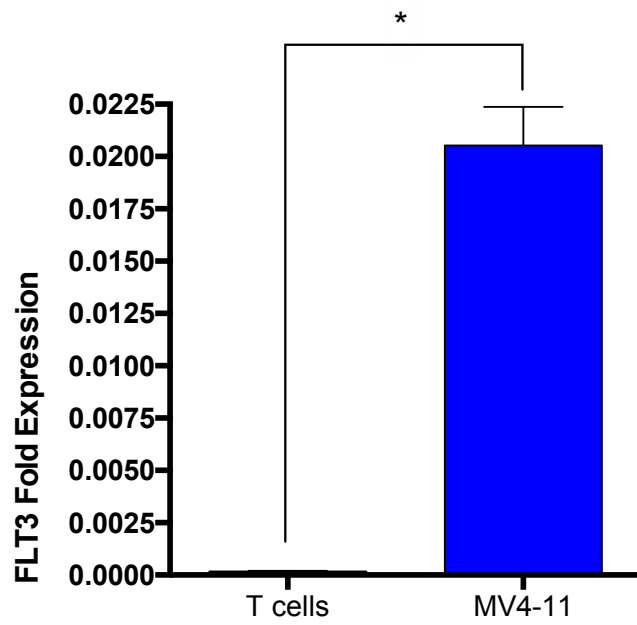

**Figure S2. FLT3 Expression in T cells.** Levels of FLT3 were measured in T cells (N=5) and compared with MV4-11 cells (n=3)(P<0.001).

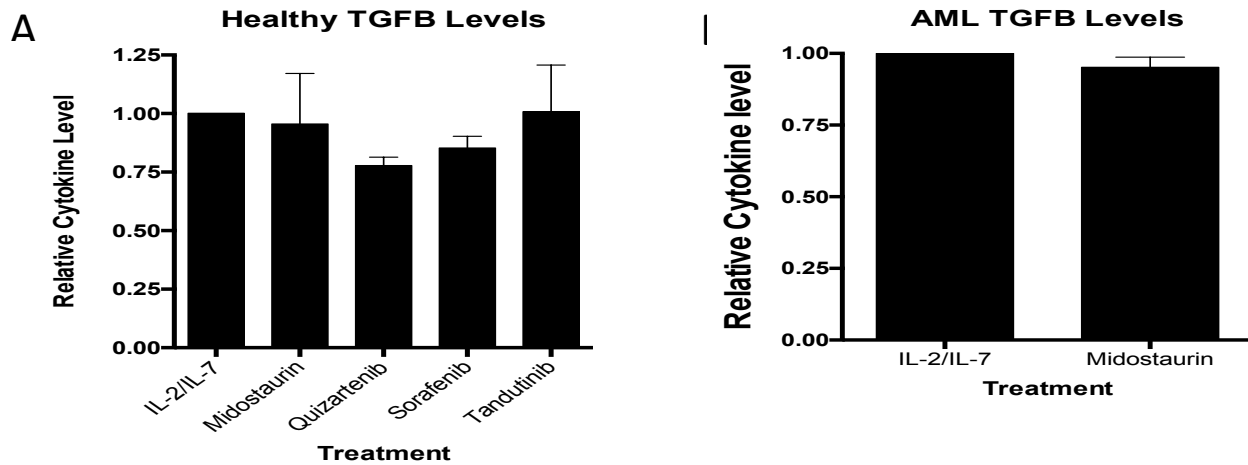

**Figure S3. Midostaurin does not affect TGFβ levels.** A) TGFβ levels in picograms/ml were measured in cell treated supernatants and normalized to IL-2/IL-7 treated group for healthy patients (n=3, p=0.42) B) TGFβ levels in picograms/ml were measured in cell treated supernatants and normalized to IL-2/IL-7 treated group for patients with AML (n=5, p=0.10).
